# Supplementary material for: Cloning, Expression, Purification, and Characterization of β-Galactosidase from Bifidobacterium longum and Bifidobacterium pseudocatenulatum
Source: MDPI journal article supplement (doi:10.3390/molecules27144497), 2022-07-14
Supplement: s1 [file s1]

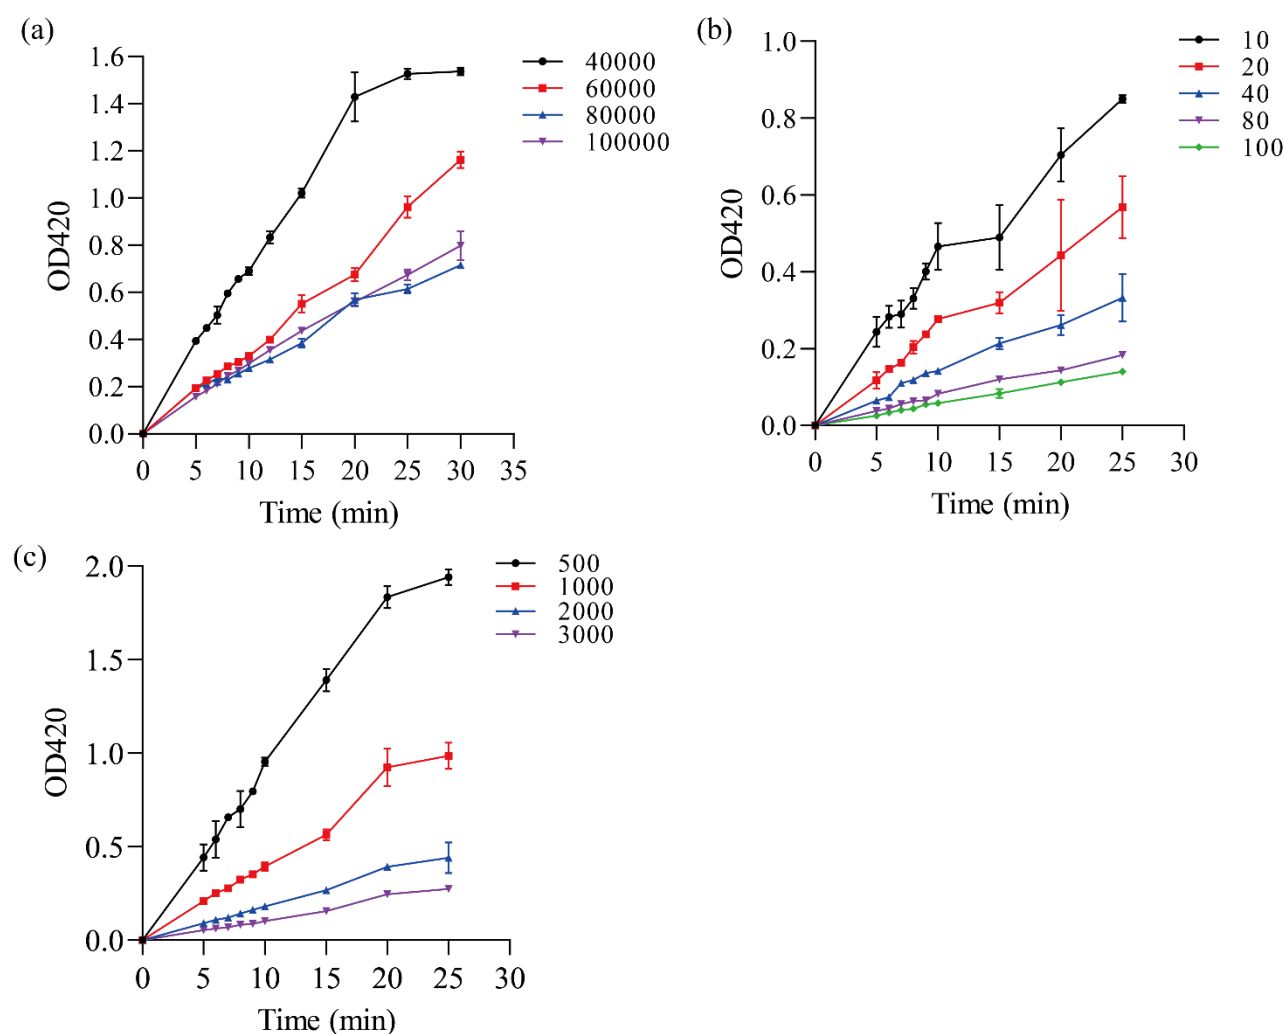

**Figure S1.** Enzyme reaction of BLGLB1 (a), BPGLB1 (b) and commercial  $\beta$ -galactosidase E (c) at different dilution gradients and reaction times. The numbers in the legend indicate the dilution factor, The initial concentration of BLGLB1, BPGLB1 and commercial  $\beta$ -galactosidase E were 34.8 mg/mL, 17.8 mg/mL, and 21.92 mg/mL respectively.

(a)

| Descriptions                                                                                                                                                             | Graphic Summary                                             | Alignments                             | Taxonomy  |             |             |                        |            |          |                                |
|--------------------------------------------------------------------------------------------------------------------------------------------------------------------------|-------------------------------------------------------------|----------------------------------------|-----------|-------------|-------------|------------------------|------------|----------|--------------------------------|
| Sequences producing significant alignments                                                                                                                               |                                                             |                                        |           |             |             |                        |            |          |                                |
| Download <span>▼</span> <span>New</span> Select columns <span>▼</span> Show <span>100</span> <span>▼</span> <span>?</span>                                               |                                                             |                                        |           |             |             |                        |            |          |                                |
| <input checked="" type="checkbox"/> select all 100 sequences selected                                                                                                    |                                                             |                                        |           |             |             |                        |            |          |                                |
| <a href="#">GenPept</a> <a href="#">Graphics</a> <a href="#">Distance tree of results</a> <a href="#">Multiple alignment</a> <span>New</span> <a href="#">MSA Viewer</a> |                                                             |                                        |           |             |             |                        |            |          |                                |
|                                                                                                                                                                          | Description <span>▼</span>                                  | Scientific Name <span>▼</span>         | Max Score | Total Score | Query Cover | E value <span>▼</span> | Per. Ident | Acc. Len | Accession                      |
| <input checked="" type="checkbox"/>                                                                                                                                      | <a href="#">beta-galactosidase [Bifidobacterium longum]</a> | <a href="#">Bifidobacterium longum</a> | 1492      | 1492        | 100%        | 0.0                    | 100.00%    | 719      | <a href="#">WP_032737298.1</a> |
| <input checked="" type="checkbox"/>                                                                                                                                      | <a href="#">beta-galactosidase [Bifidobacterium longum]</a> | <a href="#">Bifidobacterium longum</a> | 1491      | 1491        | 100%        | 0.0                    | 99.86%     | 719      | <a href="#">WP_118378847.1</a> |
| <input checked="" type="checkbox"/>                                                                                                                                      | <a href="#">beta-galactosidase [Bifidobacterium longum]</a> | <a href="#">Bifidobacterium longum</a> | 1491      | 1491        | 100%        | 0.0                    | 99.86%     | 719      | <a href="#">WP_117726849.1</a> |
| <input checked="" type="checkbox"/>                                                                                                                                      | <a href="#">beta-galactosidase [Bifidobacterium longum]</a> | <a href="#">Bifidobacterium longum</a> | 1491      | 1491        | 100%        | 0.0                    | 99.86%     | 719      | <a href="#">WP_137658343.1</a> |
| <input checked="" type="checkbox"/>                                                                                                                                      | <a href="#">beta-galactosidase [Bifidobacterium longum]</a> | <a href="#">Bifidobacterium longum</a> | 1491      | 1491        | 100%        | 0.0                    | 99.86%     | 719      | <a href="#">WP_032745970.1</a> |
| <input checked="" type="checkbox"/>                                                                                                                                      | <a href="#">beta-galactosidase [Bifidobacterium longum]</a> | <a href="#">Bifidobacterium longum</a> | 1490      | 1490        | 100%        | 0.0                    | 99.86%     | 719      | <a href="#">WP_209153332.1</a> |
| <input checked="" type="checkbox"/>                                                                                                                                      | <a href="#">beta-galactosidase [Bifidobacterium longum]</a> | <a href="#">Bifidobacterium longum</a> | 1490      | 1490        | 100%        | 0.0                    | 99.86%     | 719      | <a href="#">WP_131219566.1</a> |
| <input checked="" type="checkbox"/>                                                                                                                                      | <a href="#">beta-galactosidase [Bifidobacterium longum]</a> | <a href="#">Bifidobacterium longum</a> | 1490      | 1490        | 100%        | 0.0                    | 99.86%     | 719      | <a href="#">WP_059290615.1</a> |
| <input checked="" type="checkbox"/>                                                                                                                                      | <a href="#">beta-galactosidase [Bifidobacterium longum]</a> | <a href="#">Bifidobacterium longum</a> | 1490      | 1490        | 100%        | 0.0                    | 99.72%     | 719      | <a href="#">WP_195338401.1</a> |
| <input checked="" type="checkbox"/>                                                                                                                                      | <a href="#">beta-galactosidase [Bifidobacterium longum]</a> | <a href="#">Bifidobacterium longum</a> | 1489      | 1489        | 100%        | 0.0                    | 99.72%     | 719      | <a href="#">WP_217052804.1</a> |

(b)

Descriptions

Graphic Summary

Alignments

Taxonomy

Sequences producing significant alignments

Download

New

Select columns

Show

100

?

☒

select all

100 sequences selected

GenPept

Graphics

Distance tree of results

Multiple alignment

New

MSA Viewer

|                                     | Description                                            | Scientific Name                                   | Max Score | Total Score | Query Cover | E value | Per. Ident | Acc. Len | Accession                      |
|-------------------------------------|--------------------------------------------------------|---------------------------------------------------|-----------|-------------|-------------|---------|------------|----------|--------------------------------|
| <input checked="" type="checkbox"/> | beta-galactosidase [Bifidobacterium pseudocatenulatum] | <a href="#">Bifidobacterium pseudocatenulatum</a> | 1444      | 1444        | 100%        | 0.0     | 99.86%     | 696      | <a href="#">WP_117656455.1</a> |
| <input checked="" type="checkbox"/> | MULTISPECIES: beta-galactosidase [Bifidobacterium]     | <a href="#">Bifidobacterium</a>                   | 1442      | 1442        | 100%        | 0.0     | 99.71%     | 696      | <a href="#">WP_065441898.1</a> |
| <input checked="" type="checkbox"/> | beta-galactosidase [Bifidobacterium pseudocatenulatum] | <a href="#">Bifidobacterium pseudocatenulatum</a> | 1440      | 1440        | 100%        | 0.0     | 99.57%     | 696      | <a href="#">WP_055063652.1</a> |
| <input checked="" type="checkbox"/> | beta-galactosidase [Bifidobacterium pseudocatenulatum] | <a href="#">Bifidobacterium pseudocatenulatum</a> | 1440      | 1440        | 100%        | 0.0     | 99.57%     | 696      | <a href="#">WP_195552043.1</a> |
| <input checked="" type="checkbox"/> | beta-galactosidase [Bifidobacterium pseudocatenulatum] | <a href="#">Bifidobacterium pseudocatenulatum</a> | 1439      | 1439        | 100%        | 0.0     | 99.57%     | 696      | <a href="#">WP_117750590.1</a> |
| <input checked="" type="checkbox"/> | beta-galactosidase [Bifidobacterium pseudocatenulatum] | <a href="#">Bifidobacterium pseudocatenulatum</a> | 1439      | 1439        | 100%        | 0.0     | 99.43%     | 696      | <a href="#">MZL55701.1</a>     |
| <input checked="" type="checkbox"/> | beta-galactosidase [Bifidobacterium pseudocatenulatum] | <a href="#">Bifidobacterium pseudocatenulatum</a> | 1439      | 1439        | 100%        | 0.0     | 99.57%     | 696      | <a href="#">RHH03385.1</a>     |
| <input checked="" type="checkbox"/> | beta-galactosidase [Bifidobacterium pseudocatenulatum] | <a href="#">Bifidobacterium pseudocatenulatum</a> | 1439      | 1439        | 100%        | 0.0     | 99.57%     | 696      | <a href="#">WP_118279679.1</a> |
| <input checked="" type="checkbox"/> | beta-galactosidase [Bifidobacterium pseudocatenulatum] | <a href="#">Bifidobacterium pseudocatenulatum</a> | 1439      | 1439        | 100%        | 0.0     | 99.57%     | 696      | <a href="#">WP_004221064.1</a> |
| <input checked="" type="checkbox"/> | beta-galactosidase [Bifidobacterium pseudocatenulatum] | <a href="#">Bifidobacterium pseudocatenulatum</a> | 1439      | 1439        | 100%        | 0.0     | 99.57%     | 696      | <a href="#">WP_118269314.1</a> |

Figure S2. NCBI BLASTp results of the BLGLB1 (a), BPGLB1 (b).

|            | 1           | 10         | 20        | 30        | 40         | 50              |
|------------|-------------|------------|-----------|-----------|------------|-----------------|
| AAR24113.1 | .....MSA    | RRNFEWPEL  | LLTADGRG  | IAFGGDYND | PDQWSEDIW  | DDDLRLMKQAGVNT  |
| ACJ53184.1 | .....MRA    | RRDFAWPKL  | LLTADGRG  | IAFGGDYND | PDQWPEDEV  | DDDLRLMKQAGVNT  |
| BPGLB1     | .....M      | HRTFKWPEL  | LLTDNGKG  | IAYGGDYND | PDQWSEDEV  | DDDLRLMKQAGVNT  |
| ABE95118.1 | .....MTT    | RRAFRWPSL  | LLTESGRG  | IAFGGDYND | PDQWPEETL  | DDDLRLMGEGAGVNV |
| BAR71185.1 | .....MTT    | RRAFRWPSL  | LLTESGRG  | IAFGGDYND | PDQWPEETL  | DDDLRLMDEAGVNV  |
| ALO71994.1 | .....MTT    | RRAFRWPSL  | LLTESGRG  | IAFGGDYND | PDQWPEETL  | DDDLRLMGEGAGVNV |
| BLGLB1     | .....MTT    | RRTFRWPSL  | LLTESGRG  | IAFGGDYND | PDQWSEETL  | DDDLRLMVQAGVNT  |
| ACJ53083.1 | .....ME     | HRAFKWQPL  | LAGNKPR   | IWYGGDYND | PDQWPEEVW  | DDDLVALMQQAGVNL |
| AAL02053.1 | .....ME     | HRAFKWQPL  | LAGNKPR   | IWYGGDYND | PDQWPEEVW  | DDDLVALMQQAGVNL |
| AAU00556.1 | .....ME     | HREFKWQPL  | LAGGKPR   | IWYGGDYND | PDQWPEEVW  | DDDLVALMQKAGVNL |
| ABE95226.1 | .....ME     | HREFKWQPL  | LAGGKPR   | IWYGGDYND | PDQWPEEVW  | DDDLVALMQKAGVNL |
| ACD98372.1 | .....ME     | RKEFKWQPL  | LAGNEPR   | IWYGGDYND | PDQWPEEVW  | DDDLRLMQQAGVNL  |
| BAQ98551.1 | .....MERN   | MSKRRKHSWP | PLKGAESR  | LWYGGDYND | PDQWPEEVW  | DDDLRLMKKAGVNL  |
| ABP87597.1 | .....MSK    | RRKHSWP    | PLKGAESR  | LWYGGDYND | PDQWPEEVW  | DDDLRLMKKAGVNL  |
| ADO53518.1 | .....MSK    | RRKHSWP    | PLKGAESR  | LWYGGDYND | PDQWPEEVW  | DDDLRLMKKAGVNL  |
| CAC14567.1 | .....MAQ    | RRHRWPKP   | LSGRPDR   | IWYGGDYND | PDQWPEDEV  | DDDLRLMRQAGVNL  |
| AGH68883.1 | .....MSASTQ | HRHRWPKP   | PLPGNDRK  | IWFGADYND | PDQWPEDEV  | QDDDLRLMKQAGVNT |
| ACS45863.1 | .....MSASTQ | HRHRWPKP   | PLPGNDRK  | IWFGADYND | PDQWPEDEV  | QDDDLRLMKQAGVNT |
| ACJ53470.1 | MTDTMAHTQ   | PASPASPAPT | ITAPGGRFV | FGGDWNPE  | QWDESTWADD | IAKLERAGINE     |
| ACS45449.1 | .....MAR    | AYTDPLF    | LG.....   | AAYYDEYIP | ..RDLDR    | IDTDMEMMTRAGENV |

|            | 60       | 70     | 80    | 90     | 100   | 110                                |
|------------|----------|--------|-------|--------|-------|------------------------------------|
| AAR24113.1 | VALAIFS  | WDRIQP | TEDRW | WDFGWL | DRIID | KLGNAGIVVDLASATATAPLWLYESHPEVLP    |
| ACJ53184.1 | VALAIFS  | WDRIQP | TEDRW | WDFGWL | DRIID | KLGNAGIVVDLASATATAPLWLYENHPEVLP    |
| BPGLB1     | VALAIFS  | WDRIQP | ENRW  | WDFGWL | DRIID | KLGNAGIVVDLASATATAPLWLYEKHPEVLP    |
| ABE95118.1 | VSLAIFS  | WDKIEP | VEGAF | TFEFLD | HVID  | DLGKAGIAVDLASATATAPLWLYESHPEVLP    |
| BAR71185.1 | VSLAIFS  | WDKIEP | VEGAF | TFEFLD | HVID  | DLGKAGIAVDLASATATAPLWLYESHPEVLP    |
| ALO71994.1 | VSLAIFS  | WDKIEP | VEGAF | TFEFLD | HVID  | DLGKAGIAVDLASATATAPLWLYESHPEVLP    |
| BLGLB1     | VALAIFS  | WDKIEP | REGF  | TFEFLD | HVID  | DLGAAGIAVDLASATATAPLWLYERHPEVLP    |
| ACJ53083.1 | VSVAFIS  | WAKLEP | EEGV  | YDFDWL | DRVID | KLGNAGIAVDLASATASPMMWMTQAHPEILWV   |
| AAL02053.1 | VSVAFIS  | WAKLEP | EEGV  | YDFDWL | DRVID | KLGNAGIAVDLASATASPMMWMTQAHPEILWV   |
| AAU00556.1 | VSVAFIS  | WAKLEP | EEGV  | YDFDWL | DRVID | KLGNAGIAVDLASATASPMMWMTQAHPEILWV   |
| ABE95226.1 | VSVAFIS  | WAKLEP | EEGV  | YDFDWL | DRVID | KLGNAGIAVDLASATASPMMWMTQAHPEILWV   |
| ACD98372.1 | VSVAFIS  | WAKLEP | EEGV  | YDFDWL | DRVID | KLGNAGIAVDLASATASPMMWMTQAHPEILWV   |
| BAQ98551.1 | VSVGIFS  | WAKIEP | EEGK  | YDFDWL | DRAID | KLGNAGIAVDLASATASPMMWMTQAHPEILWK   |
| ABP87597.1 | VSVGIFS  | WAKIEP | EEGK  | YDFDWL | DRAID | KLGNAGIAVDLASATASPMMWMTQAHPEILWK   |
| ADO53518.1 | VSVGIFS  | WAKIEP | EEGK  | YDFDWL | DRAID | KLGNAGIAVDLASATASPMMWMTQAHPEILWK   |
| CAC14567.1 | VSVGIFS  | WAKIEP | EEGK  | YDFDWL | DRAID | KLGNAGIAVDLASATASPMMWMTQAHPEILWK   |
| AGH68883.1 | VSLAIFS  | WANIEP | SDGN  | FEFDWL | DRVID | KLGNAGIAVDLASATASPMMWMTSAHPEVLR    |
| ACS45863.1 | VSLAIFS  | WANIEP | SDGN  | FEFDWL | DRVID | KLGNAGIAVDLASATASPMMWMTSAHPEVLR    |
| ACJ53470.1 | ATTNVFS  | WALIQP | DES   | RDFDWL | DRVID | LLVAHDFGFVLAISGALPAWTAQRYPDATRT    |
| ACS45449.1 | IRIGESTW | STCEP  | QPGH  | FDWTHI | DRAID | DAATNAGINVIIVGTIYAVPTWLVAMYPDVILAT |

|            | 120   | 130    | 140    | 150    | 160           | 170                              |
|------------|-------|--------|--------|--------|---------------|----------------------------------|
| AAR24113.1 | DKYGH | HPVNA  | GSRO   | SWSP   | SPVFKEYALT    | LCKRLAERYGTNPYVTAWHMGNEYGWNNRDDY |
| ACJ53184.1 | DKYGH | HPVNA  | GSRO   | SWSP   | SPVFKEYALT    | LCKRLAERYGTNPYVTAWHMGNEYGWNNRDDY |
| BPGLB1     | DKYGH | HPVNA  | GSRO   | SWSP   | SPVFKEYALT    | LCKRLAERYGTNPYVTAWHMGNEYGWNNRDDY |
| ABE95118.1 | DRYGH | IVNAG  | GSRO   | SWQPT  | SPVFKEYALT    | LCKRLAERYGTNPYVTAWHMGNEYGWNNRDDY |
| BAR71185.1 | DRYGH | IVNAG  | GSRO   | SWQPT  | SPVFKEYALT    | LCKRLAERYGTNPYVTAWHMGNEYGWNNRDDY |
| ALO71994.1 | DRYGH | IVNAG  | GSRO   | SWQPT  | SPVFKEYALT    | LCKRLAERYGTNPYVTAWHMGNEYGWNNRDDY |
| BLGLB1     | DRYGH | IVNAG  | GSRO   | SWQPT  | SPVFKEYALT    | LCKRLAERYGTNPYVTAWHMGNEYGWNNRDDY |
| ACJ53083.1 | DYRGD | VQCQP  | GARGH  | WRATSP | VFVLDYALN     | LCKRMAEHYKDNYPYVSWHVSNEYGCHNRFDY |
| AAL02053.1 | DYRGD | VQCQP  | GARGH  | WRATSP | VFVLDYALN     | LCKRMAEHYKDNYPYVSWHVSNEYGCHNRFDY |
| AAU00556.1 | DYRGD | VQCQP  | GARGH  | WRATSP | VFVLDYALN     | LCKRMAEHYKDNYPYVSWHVSNEYGCHNRFDY |
| ABE95226.1 | DYRGD | VQCQP  | GARGH  | WRATSP | VFVLDYALN     | LCKRMAEHYKDNYPYVSWHVSNEYGCHNRFDY |
| ACD98372.1 | DYRGD | VQCQP  | GARGH  | WRATSP | VFVLDYALN     | LCKRMAEHYKDNYPYVSWHVSNEYGCHNRFDY |
| BAQ98551.1 | DERGD | TVWVP  | GAREH  | WRPTSP | VFREYALN      | LCKRMAEHYKGNPYVVAWHVSNEYGCHNRFDY |
| ABP87597.1 | DERGD | TVWVP  | GAREH  | WRPTSP | VFREYALN      | LCKRMAEHYKGNPYVVAWHVSNEYGCHNRFDY |
| ADO53518.1 | DERGD | TVWVP  | GAREH  | WRPTSP | VFREYALN      | LCKRMAEHYKGNPYVVAWHVSNEYGCHNRFDY |
| CAC14567.1 | DERGD | VQCQP  | GARGH  | WRPTSP | VFREYALN      | LCKRMAEHYKGNPYVVAWHVSNEYGCHNRFDY |
| AGH68883.1 | DEQGH | VIWVP  | GARGH  | WRPTSP | TFRTYALN      | LCKRMAEHYKGNPYVVAWHVSNEYGCHNRFDY |
| ACS45863.1 | DEQGH | VIWVP  | GARGH  | WRPTSP | TFRTYALN      | LCKRMAEHYKGNPYVVAWHVSNEYGCHNRFDY |
| ACJ53470.1 | DYRGD | RRHRF  | GVRHNA | CNSP   | SNFLRLAGA     | LCKRMAEHYKGNPYVVAWHVSNEYGCHNRFDY |
| ACS45449.1 | TPAC  | G.EPHY | GARGO  | IMN    | IVNPEAYRLYGER | VIRSLISHVAQQPCVIGYQVDNETKYYDSVSH |

|            | 180   | 190   | 200 | 210         | 220       |              |
|------------|-------|-------|-----|-------------|-----------|--------------|
| AAR24113.1 | SDNAL | EAFRA | WCR | RRKYGTIDALN | QAWGTTFWQ | QEMNGFDEVLHP |
| ACJ53184.1 | SDNAL | EAFRA | WCR | RRKYGTIDALN | QAWGTTFWQ | QEMNGFDEVLHP |
| BPGLB1     | SDNAL | EAFRA | WCR | RRKYGTIDALN | QAWGTTFWQ | QEMNGFDEVLHP |
| ABE95118.1 | SDNAL | EAFRA | WCR | RRKYGTIDALN | QAWGTTFWQ | QEMNGFDEVLHP |
| BAR71185.1 | SDNAL | EAFRA | WCR | RRKYGTIDALN | QAWGTTFWQ | QEMNGFDEVLHP |
| ALO71994.1 | SDNAL | EAFRA | WCR | RRKYGTIDALN | QAWGTTFWQ | QEMNGFDEVLHP |
| BLGLB1     | SDNAL | EAFRA | WCR | RRKYGTIDALN | QAWGTTFWQ | QEMNGFDEVLHP |
| ACJ53083.1 | SDNAL | EAFRA | WCR | RRKYGTIDALN | QAWGTTFWQ | QEMNGFDEVLHP |
| AAL02053.1 | SDNAL | EAFRA | WCR | RRKYGTIDALN | QAWGTTFWQ | QEMNGFDEVLHP |
| AAU00556.1 | SDNAL | EAFRA | WCR | RRKYGTIDALN | QAWGTTFWQ | QEMNGFDEVLHP |
| ABE95226.1 | SDNAL | EAFRA | WCR | RRKYGTIDALN | QAWGTTFWQ | QEMNGFDEVLHP |
| ACD98372.1 | SDNAL | EAFRA | WCR | RRKYGTIDALN | QAWGTTFWQ | QEMNGFDEVLHP |
| BAQ98551.1 | SDNAL | EAFRA | WCR | RRKYGTIDALN | QAWGTTFWQ | QEMNGFDEVLHP |
| ABP87597.1 | SDNAL | EAFRA | WCR | RRKYGTIDALN | QAWGTTFWQ | QEMNGFDEVLHP |
| ADO53518.1 | SDNAL | EAFRA | WCR | RRKYGTIDALN | QAWGTTFWQ | QEMNGFDEVLHP |
| CAC14567.1 | SDNAL | EAFRA | WCR | RRKYGTIDALN | QAWGTTFWQ | QEMNGFDEVLHP |
| AGH68883.1 | SDNAL | EAFRA | WCR | RRKYGTIDALN | QAWGTTFWQ | QEMNGFDEVLHP |
| ACS45863.1 | SDNAL | EAFRA | WCR | RRKYGTIDALN | QAWGTTFWQ | QEMNGFDEVLHP |
| ACJ53470.1 | SDNAL | EAFRA | WCR | RRKYGTIDALN | QAWGTTFWQ | QEMNGFDEVLHP |
| ACS45449.1 | SDNAL | EAFRA | WCR | RRKYGTIDALN | QAWGTTFWQ | QEMNGFDEVLHP |

230 240 250 260 270 280  
AAR24113.1 R S S T F E R F G N D M L L D F Y K A E R D A I A E I C P D K P F F T N . . . . . F M V S T D Q C C M D Y A A W A K  
ACJ53184.1 Q K L D F E R F G N D M L L D F Y K A E R D A I A E I C P D K P F F T N . . . . . F M I S T D Q C C M D Y A A W A E  
BPGLB1 Q K L D F E R F G N D M L L D F Y K A E R D A I A E I C P D K P F F T N . . . . . F M V S T D Q C C M D Y A A W A E  
ABE95118.1 Q Q L D Y E R F G N D M L L D F Y K A E R D A I E Q I C P G K P F F T N . . . . . F M V S T D Q C V M D Y A K W A G  
BAR71185.1 Q Q L D Y E R F G N D M L L D F Y K A E R D A I E Q I C P D K P F F T N . . . . . F M V S T D Q C V M D Y A K W A G  
ALO71994.1 Q Q L D Y E R F G N D M L L D F Y K A E R D A I E Q I C P D K P F F T N . . . . . F M V S T D Q C V M N Y A K W A D  
BLGLB1 Q Q L D Y E R F G N D M L L D F Y K A E R D A I E E I C P G K P F F T N . . . . . F M V S T D Q C T M D Y A Q W A N  
ACJ53083.1 K L L D W K R F S D A L L D F Y K A E R D A L L E I A P . K P Q T N . . . . . F M V S A G C T V L D Y D K W G H  
K L L D W K R F S D A L L D F Y K A E R D A L L E I A P . K P Q T N . . . . . F M V S A G C T V L D Y D K W G H  
AAU00556.1 K L L D W K R F S D A L L D F Y K A E R D A L L E I A P . K P Q T N . . . . . F M V S A G G A G I D Y D K W G Y  
K L L D W K R F S D A L L D F Y K A E R D A L L E I A P . K P Q T N . . . . . F M V S A G G A G I D Y D K W G Y  
ACD98372.1 K L L D W K R F S D A L L D F Y K A E R D A L L E I A P . K P Q T N . . . . . F M V S A G G T G I D Y D K W G Y  
BAQ98551.1 K L L D Y K R F S D A L K E L Y I A E R D V L E S I T P G L P L T N . . . . . F M V S A G G S M L D Y D D W G A  
ABP87597.1 K L L D Y K R F S D A L K E L Y I A E R D V L E S I T P G L P L T N . . . . . F M V S A G G S M L D Y D D W G A  
ADO53518.1 K L L D Y K R F S D A L K E L Y I A E R D V L E S I T P G L P L T N . . . . . F M V S A G G S M L D Y D D W G A  
CAC14567.1 K L L D F K R F S D A L K A F Y M A E P D T L A E I T P D L P L T N . . . . . F M V S A S G T G L D Y D D W G G  
AGH68883.1 R L L D F K H F C S D A L K E F F C A E R D V L S E V T P N I P L T N . . . . . F M V S A S Q N T L D Y D D W A H  
ACS45863.1 R L L D F K H F C S D A L K E F F C A E R D V L S E V T P N I P L T N . . . . . F M V S A S Q N T L D Y D D W A H  
ACJ53470.1 C S I D Y K R F Q S D S L L G T Y V T E R D A I R A F D A M H P I T N . . . . . L M D T Y E G . . A D Y F R W G R  
ACS45449.1 L R A R F D R F R R D Q V A E Y L A W Q A S I I R E Y M R D D Q F I H N F D Y E W R G H S Y G L Q P A V D H F R A A R

290 300 310 320 330  
AAR24113.1 E V N F V S N D H Y F H E G E S H L D . E L A C S D A L M D S L A L G K P W Y V M E H S T S A V Q W K P L N T R K R K G  
ACJ53184.1 E V N F V S N D H Y F H E G E S H L D . E L A C S D A L V D S L A L G K P W Y V M E H S T S A V Q W K P L N T R K R N  
BPGLB1 E V D F V S N D H Y F H E G E S H I D . E L F C S D A L M D S L A L G K P W Y V M E H S T S A V Q W K P L N A R K R K G  
ABE95118.1 E V D F V S N D H Y F H E G E S H L D . E L A C S D A L M D S L A L G K P W Y V M E H S T S A V Q W K P L N A R K R A G  
BAR71185.1 E V D F V S N D H Y F H E G E S H L D . E L A C S D A L M D S L A L G K P W Y V M E H S T S A V Q W K P L N A R K R A G  
ALO71994.1 E V D F V S N D H Y F H E G E S H L D . E L A C S D A L M D S L A L G K P W Y V M E H S T S A V Q W K P L N T R K R A G  
BLGLB1 E V D F V S N D H Y F H E G E S H L D . E L A C S D A L M D S L A L G K P W Y V M E H S T S A V Q W K P L N M R K R A G  
ACJ53083.1 D V D F V S N D H Y F S P G E A H F D . E M A Y A A C L T D G I A R K N P W F L M E H S T S A V N W R P T N Y R L E E F G  
AAL02053.1 D V D F V S N D H Y F S P G E A H F D . E M A Y A A C L T D G I A R K N P W F L M E H S T S A V N W R P T N Y R L E E F G  
AAU00556.1 D V D F V S N D H Y F T P G E A H F D . E L A Y S A S L C D G I A R K N P W F L M E H S S A V N W R P I N Y R V E F G  
ABE95226.1 D V D F V S N D H Y F T P G E A H F D . E L A Y S A S L C D G I A R K N P W F L M E H S S A V N W R P I N Y R V E F G  
ACD98372.1 D V D F V S N D H Y F T P G E A H F D . E L A Y S A S L C D G I A R K N P W F L M E H S S A V N W R P I N Y R V E F G  
BAQ98551.1 E V D F V S N D H Y F T P G E D H F D . E V A Y A A S L M D G I S R K E P W F Q M E H S T S A V N W R P I N Y R A E E F G  
ABP87597.1 E V D F V S N D H Y F T P G E D H F D . E V A Y A A S L M D G I S R K E P W F Q M E H S T S A V N W R P I N Y R A E E F G  
ADO53518.1 E V D F V S N D H Y F T P G E A H F D . E V A Y A A S L M D G I S R K E P W F Q M E H S T S A V N W R P I N Y R A E E F G  
CAC14567.1 E V D F V S N D H Y F T P G E A H L D . E L A F S A S L V D G I S R K N P W F L M E H S T S A V N W R P I N Y R K E F G  
AGH68883.1 E V D F V S N D H Y F T P G S W H I D . E L A Y S A S L V D G I S R K K P W F L M E Q S T S A V N W R E I N P R K E F G  
ACS45863.1 E V D F V S N D H Y F T P G S W H I D . E L A Y S A S L V D G I S R K K P W F L M E Q S T S A V N W R E I N P R K E F G  
ACJ53470.1 E M D V I S W D D Y F P P . H T T P S . D N A F K H D L M R G V D G R P F M L M E S T P N Q T N W Q E C N V L R A P G  
ACS45449.1 A L D I C G V D I Y H P S E D A L T G K E I A F G G D M A R S A G G G N Y L V L E T Q A Q G Q H G W L P Y . . . . . P G

340 350 360 370 380 390  
AAR24113.1 E T V R D S L A H V A M G A D A I N F F Q W R S A F G A E A F H S A M V P H A G . . . . E D T K L F R Q V C E I G A S  
ACJ53184.1 E T V R D S L A H V A M G A D A I N F F Q W R S A F G A E A F H S A M V P H A G . . . . E N T K L F R Q V C E I G A T  
BPGLB1 E T V R D S I A H V A M G A D A I N F F Q W R S A F G A E S F H S A L V P H A G . . . . E D T K L F R Q V C E I G A A  
ABE95118.1 E L M R D S L A H V A M G A D A I C F F Q W R Q S V S G A E A F H S A M L P H A G . . . . A D T K V F R G V C E I G K A  
BAR71185.1 E L M R D S L A H V A M G A D A I C F F Q W R Q S V S G A E A F H S A M L P H A G . . . . A D S K V F R G V C E I G K A  
ALO71994.1 E L M R D S L A H V A M G A D A I C F F Q W R Q S V S G A E A F H S A M L P H A G . . . . A D S K V F R G V C E I G K A  
BLGLB1 E L M R D S L A H V A M G A D A I N F F Q W R Q S A S G A E A F H S A M V P H A G . . . . S D T K L F R Q V C E I G A A  
ACJ53083.1 E L V R D S L A H L A M G A D A I C Y F Q W R Q S K A G A E K W H S A M V P H A G . . . . P D S Q I F R D V C E I G A D  
AAL02053.1 E L V R D S L A H L A M G A D A I C Y F Q W R Q S K A G A E K W H S A M V P H A G . . . . P D S Q I F R D V C E I G A D  
AAU00556.1 E L V R D S L A H L A M G A D A I C Y F Q W R Q S K A G A E K W H S S M V P H A G . . . . P D S Q I F R D V C E I G A D  
ABE95226.1 E L V R D S L A H L A M G A D A I C Y F Q W R Q S K A G A E K W H S S M V P H A G . . . . P D S Q I F R D V C E I G A D  
ACD98372.1 E L V R D S L A H L A M G S D A I C Y F Q W R Q S K A G A E K W H S S M V P H A G . . . . P D S Q I F R D V C E I G A D  
BAQ98551.1 S V V R D S L A Q V A M G A D A I C Y F Q W R Q S K A G A E K W H S S M V P H A G . . . . E D S Q I F R D V C E I G A D  
ABP87597.1 S V V R D S L A Q V A M G A D A I C Y F Q W R Q S K A G A E K W H S S M V P H A G . . . . E D S Q I F R D V C E I G A D  
ADO53518.1 S V V R D S L A Q V A M G A D A I C Y F Q W R Q S K A G A E K W H S S M V P H A G . . . . E D S Q I F R D V C E I G A D  
CAC14567.1 Q L V R D S L A H V A M G S D A V C Y F Q W R Q S K A G A E K F H S A M L P H A G . . . . E D S Q V F R D V C E I G S G  
AGH68883.1 E L T R D S M L H L A M G A D A I C Y F Q W R Q S R S G A E K F H S A M L P L A G . . . . E H S Q I Y R D V C A L G A D  
ACS45863.1 E L T R D S M L H L A M G A D A I C Y F Q W R Q S R S G A E K F H S A M L P L A G . . . . E H S Q I Y R D V C A L G A D  
ACJ53470.1 R M R A E S Y Q A V A H G A D T V Q Y F Q L K Q S R G G F E K Y H G A V I S H G R . . . . E D E R V Y G E V R A L G E G  
ACS45449.1 Q L R L Q A Y S H L A S G A D G I M Y W H W H S I H N S F E T Y W R G L L S H D F E S N P T Y E E A G R F G R E I G D P

400 410 420 430 440 450  
AAR24113.1 L H T L A D A G V Q G T E L A H S D T A I L F S A E S E W A T R S Q T L P S M K L N H W H D V R D . W Y R A F L D A G S  
ACJ53184.1 L Q A L A D A G V Q G S E L A H A D T A I L F S A E S E W A T R S E T L P S M K L N H W H D V R D . W Y R A F L N A G A  
BPGLB1 L K T L S D A G V Q G T E L E Q S D T A I L F S A E S E W A T R S E T L P S M K L N H W H D V R D . W Y R A F L N A G T  
ABE95118.1 L K T L S D A G L Q G T E L E R A G T A I L F S A E S E W A T R S E T L P S M K L N H W H D V R D . W Y R G F L D A G L  
BAR71185.1 L K T L S D A G L Q G T E L E R A G T A I L F S A E S E W A T R S E T L P S M K L N H W H D V R D . W Y R G F L D A G L  
ALO71994.1 L K T L S D A G L Q G T E L E R A G T A I L F S A E S E W A T R S E T L P S M K L N H W H D V R D . W Y R G F L D A G L  
BLGLB1 L K T L S D A G V Q D T E L K R A D T A I L F S A E S E W A T R S E T L P S M K L N H W H D V R D . W Y R G Y L D A G A  
ACJ53083.1 L N K L A D E G L L S T K L V K S K V A V V F D Y E S Q W A T E H T A T P T Q E V R H W T E P L D . W F R A L A D N G L  
AAL02053.1 L N K L A D E G L L S T K L V K S K V A V V F D Y E S Q W A T E H T A T P T Q E V R H W T E P L D . W F R A L A D N G L  
AAU00556.1 L N K L A D E G L L S T K L V K S K V A V V F D Y E S Q W A T E H T A T P T Q E V R H W T E P L A . W F R A L A D N G L  
ABE95226.1 L N K L A D E G L L S T K L V K S K V A V V F D Y E S Q W A T E H T A T P T Q E V R H W T E P L A . W F R A L A D N G L  
ACD98372.1 L N K L A D E G L L S T K L V K S K V A V V F D Y E S Q W A T E H T A T P T Q E V R H W T E P L A . W F R A L A D N G L  
BAQ98551.1 L G R L S D E G L M G T K T V K S K V A V V F D Y E S Q W A T E Y T A N P T Q Q V D H W T E P L D . W F R A L A D N G I  
ABP87597.1 L G R L S D E G L M G T K T V K S K V A V V F D Y E S Q W A T E Y T A N P T Q Q V D H W T E P L D . W F R A L A D N G I  
ADO53518.1 L G R L S D E G L M G T K T V K S K V A V V F D Y E S Q W A T E Y T A N P T Q Q V D H W T E P L D . W F R A L A D N G I  
CAC14567.1 L N A L A D N G L L G T R L A K S R V A V V F D Y E S E W A S E H T A T P T Q K V R H V D E P L A . W F R A L A D N G V  
AGH68883.1 L D T L S D A G I L R S K L S K A R V A I V Q D I Q S E W A T E H T A T P T Q H I R E W T E P L D . W F A A F A N R G V  
ACS45863.1 L D T L S D A G I L R S K L S K A R V A I V Q D I Q S E W A T E H T A T P T Q H I R E W T E P L D . W F A A F A N R G V  
ACJ53470.1 L A A H G A R F V G G . . L T E A P V A L M F D W D S Y W S T E N I S L P K G F D Y P D Q V R R . W Y A P F H R N I  
ACS45449.1 R I G D T L S H L S K R N A V A I L A S N E S L T A L S W F H I E T G F P M G G T L T Y N D V L R S I Y D A L F E I N V

460 470 480 490 500 510  
AAR24113.1 RADIVPLAYDWS...S YKTIVVLP T V L L S A A D T O R L A D F A A A G G R V V V G Y A T G L I D E H F H  
ACJ53184.1 RADIVPLAYDWS...S YKTIVVLP T V L M L S D A D T R R L A G F V Q D G G R V V V G Y A T G L L D E R F H  
BPGLB1 RADIVPLKYDWS...A YKTIVVLP T V I M L S A E D T O R L A D F A A A G G R V V I G Y A T G L I D E N F H  
ABE95118.1 RADVVPLAYDWT...D YKTIVLPT V L S L S D E D V R R I A D F A K A G G T V I V G Y A T G L V D E Y F H  
BAR71185.1 RADVVPLAYDWT...D YKTIVLPT V L S L P D E D V R R I A D F A K A G G T V I V G Y A T G L I D E H F H  
ALO71994.1 RADVVPLAYDWT...G YKTIVLPT V L S L S D E D V L R I A D F A K A G G T V I V G Y A A G L I D E H F H  
BLGLB1 RADVVPLAYDWS...G YQTIVLPT V I A L S D E D T R R I A D F A E N G G T V I V G Y A T G L I D E H F H  
ACJ53083.1 TADVVPVRGPD...E Y E A V V L P S L A I L S E Q T T R R V R E Y V A N G G K L F V T Y Y T G L V D D R D H  
AAL02053.1 TADVVPVRGPD...E Y E A V V L P S L A I L S E Q T T R R V R E Y V A N G G K L F V T Y Y T G L V D D R D H  
AAU00556.1 TADVVPVRGPD...E Y E A V V L P S L T I L S E E T T R R V R E Y V A N G G K L F V T Y Y T G L V D D K D H  
ABE95226.1 TADVVPVRGPD...E Y E A V V L P S L T I L S E E T T R R V R E Y V A N G G K L F V T Y Y T G L V D D K D H  
ACD98372.1 TADVVPVRGPD...E Y E A V V L P S L T I L S E E T T R R V R E Y V A N G G K L F V T Y Y T G L V D D K D H  
BAQ98551.1 TADVVPVRSDWD...S Y E I A V L P C V Y L L S E E T S R R V R E F V A N G G K L F V T Y Y T G L S D E N D H  
ABP87597.1 TADVVPVRSDWD...S Y E I A V L P C V Y L L S E E T S R R V R E F V A N G G K L F V T Y Y T G L S D E N D H  
ADO53518.1 TADVVPVRSDWD...S Y E I A V L P C V Y L L S E E T S R R V R E F V A N G G K L F V T Y Y T G L S D E N D H  
CAC14567.1 TADVVPVRSDWD...E Y E V A V L P S V Y L S E E T T R R V R E Y V A G G R L I V T Y Y T G L S D E K D H  
AGH68883.1 TADVTPIHAQWD...T Y D A V V I P C V Y L F S E E M A E R L R T F V R N G G K A F V T Y Y S A L A D E H D R  
ACS45863.1 TADVTPIHAQWD...T Y D A V V I P C V Y L F S E E M A E R L R T F V R N G G K A F V T Y Y S A L A D E H D R  
ACJ53470.1 A V D V V P E D I D A G R L A G Y R V L V A P A L M M A K P G V R E L V E G F V R A G G T F L A T V M A G M H D E H D N  
ACS45449.1 E V D F L P A D A S A D Q L A G Y S L V I A P A L Y T T D Q Q T I D R L A R Y V K N G G H L L A T M R S F V A D E N V K

520 530 540 550 560 570  
AAR24113.1 T W L G G Y P G A G D G L L R S M I G V R G E E F T I L G A E A E G E P G E I R L S S A D D S A A L D G T T T R L W Q N  
ACJ53184.1 T W L G G Y P G A G D G L L R S M I G V R G E E F N I L G T E T E D E P S E I R L A S T G D S P T M D G A V T R L W Q N  
BPGLB1 T W L G G Y P G A G D G L L R E M I G I R G E E F N I L G A E A E G E P S E I R L S S G . . . . . A V T R L W Q N  
ABE95118.1 I G L G G Y P G A G N G L L R D M I G I R S E E F N I L G E A E G E P S E I S L S N G . . . . . L T T R L W Q N  
BAR71185.1 I G L G G Y P G A G N G L L R D M I G I R S E E F N I L G E A E G E P S E I S L S N G . . . . . L M T R L W Q N  
ALO71994.1 I G L G G Y P G A G N G L L R D M I G I R S E E F N I L G E A E G E P S E I S L S N G . . . . . L T T R L W Q N  
BLGLB1 I G L G G Y P G A G N G L L R D M I G I R S E E F N I L G E A E D E P A E I G L S N G . . . . . L T T R L W Q N  
ACJ53083.1 V W L G G Y P . . . . . G S I R D V V G V R V E E F A P M G T D A P G T M D H L D L D N G . . . . . T V A H D F A D  
AAL02053.1 V W L G G Y P . . . . . G S I R D V V G V R V E E F A P M G T D A P G T M D H L D L D N G . . . . . T V A H D F A D  
AAU00556.1 V W L G G Y P . . . . . G S I R D V V G V R V E E F A P M G N D F P G A M D H L D L D N G . . . . . T V A H D F A D  
ABE95226.1 V W L G G Y P . . . . . G S I R D V V G V R V E E F A P M G N D F P G A M D H L D L D N G . . . . . T V A H D F A D  
ACD98372.1 V W L G G Y P . . . . . G S I R D V V G V R V E E F A P M G N D F P G A M D H L D L D N G . . . . . T V A H D F A D  
BAQ98551.1 I W L G G Y P . . . . . G S I R D V V G V R V E E F A P M G N D M P G A L D H L D L D N G . . . . . T V A H D F A D  
ABP87597.1 I W L G G Y P . . . . . G S I R D V V G V R V E E F A P M G N D M P G A L D H L D L D N G . . . . . T V A H D F A D  
ADO53518.1 I W L G G Y P . . . . . G S I R D V V G V R V E E F A P M G N D M P G A L D H L D L D N G . . . . . T V A H D F A D  
CAC14567.1 I W L G G Y P . . . . . G S I R D V V G V R V E E F A P L G D D W P G I P E Y L D L D N G . . . . . T T A H D F A D  
AGH68883.1 L H T E G W P . . . . . G L I G D V V G V R I E E H C P L G T L F P G M L D H L D V S N G . . . . . T V V H D L A D  
ACS45863.1 L H T E G W P . . . . . G L I G D V V G V R I E E H C P L G T L F P G M L D H L D V S N G . . . . . T V V H D L A D  
ACJ53470.1 V I L G G Y P . . . . . G A F R E V C G M R M E E M D I P D G R D V R V V F G S G E G E D . . . . . A D T D G S R V  
ACS45449.1 V W H D K A P . . . . . H H L V D I F G M T Y N Q F T R P M G V S L K C P D T L A D L A G . . . . . L A S

580 590 600 610 620 630  
AAR24113.1 D V N V T G E H A Q V L A T Y A G E A D E W E L D G T A A V T R N P Y G S G E A Y F V G C D L D V A D L T K L V R A Y  
ACJ53184.1 D V I V A G P H V Q V L A A Y A G E A N E W E L D G T A A I T R N T Y G E G E A Y F L G C D L G V S D L T R F V G W  
BPGLB1 D V N V D G E R A Q V L A T Y E G E A D E W E L G G A A A I T R N P Y G S G E T Y F V G C D L N V A D L T E F V R E N  
ABE95118.1 D V T S V A A D T T V L A S Y T G E S A A D W E L E R T P A I T S H P Y G N G T A I Y V G C D L N R H D I A Q L K A L  
BAR71185.1 D V T S V A A D A T V L A S Y T G E S A A D W E L E R T P A I T S R P Y G N G T A I Y V G C D L N R H D I A Q L K A L  
ALO71994.1 D V T S V A A D T T V L A S Y A G K S A A D W E L E R T P A I T S R P Y G N G T A I Y V G C D L N R H D I A Q L K A L  
BLGLB1 D V T S V A P D T R V L A T Y V G T A A A D W E L D G V P A I T S H P H G Q G A A I Y V G C D L G R H D I T H L K E L  
ACJ53083.1 V I T S V A D T A H V V A S F K A D . . K W T G F D G A P A I T V N D F G D G K A A Y V G A R L G R E G L A K S L P A L  
AAL02053.1 V I T S V A D T A H V V A S F K A D . . K W T G F D G A P A I T V N D F G D G K A A Y V G A R L G R E G L A K S L P A L  
AAU00556.1 V I T S V A D T A H V V A A F K A D . . K W T G F D G A P A I T I N D F G D G K A A Y V G A R L G R E G L A K S L P A L  
ABE95226.1 V I T S V A D T A H V V A S F K A D . . K W T G F D G A P A I T I N D F G D G K A A Y V G A R L G R E G L A K S L P A L  
ACD98372.1 V I T S V A D T A H V V A S F K A D . . K W T G F D G A P A I T V N D F G D G K A A Y V G A R L G R E G L A K S L P V L  
BAQ98551.1 V I T S A D T S T V L A S Y K A E . . R W T G M N E V P A I V A N G Y G D G R T V Y V G C R L G R O G L A K S L P A M  
ABP87597.1 V I T S A D T S T V L A S Y K A E . . R W T G M N E V P A I V A N G Y G D G R T V Y V G C R L G R O G L A K S L P A M  
ADO53518.1 V I T S A D T S T V L A S Y K A E . . R W T G M N E V P A I V A N G Y G D G R T V Y V G C R L G R O G L A K S L P A M  
CAC14567.1 V I T S V G E H A T V I A S F K D D . . P W T G M D G R P A I V G N A Y G E G R T V Y V G A R L G R D G I A R S L P M M  
AGH68883.1 V I D A I A D D T T V L A T F E A D . . P A T G M D G R A I T V H P Y H E G G V A Y I A G K L G R D G I A S Q S L P E I  
ACS45863.1 V I D A I A D D T T V L A T F E A D . . P A T G M D G R A I T V H P Y H E G G V A Y I A G K L G R D G I A S Q S L P E I  
ACJ53470.1 S L V A G L I K L D G G A R P L A A Y A G D V F Y R G T P A V T V N D F G A G T A Y F A G A V L D E A G M D A V G D V  
ACS45449.1 A N D F I E M L S P A P E T H V L A W Y D H Y A W D S Y A A I T R H A F G S G D A Q W V G T Q L Q A D A W R T V L A E A

640 650  
AAR24113.1 L A A S S Q E . . . . . N A D V L H T V R A S A D . . A T F D F Y L P  
ACJ53184.1 L A A R P Q D G R Q P E A . . . . . N L R S P A S G V T S D V L H T V R Q S D D . . A I F D F Y L T  
BPGLB1 I V E D S A N . . . . . V A N P T D S D V L H T V R K S A D . . A T F D F Y L S  
ABE95118.1 G S R W R E L . . . . . S A Q P T E . . . . . G G Q T P T Y P T T D P R I L H T I R R S A D G S T R F D F Y L N  
BAR71185.1 G S R W R E L . . . . . S A Q P T E . . . . . G G Q T P T Y P T T D P R I L H T I R R S A D G S T R F D F Y L N  
ALO71994.1 G S R W R E L . . . . . S A Q P T E . . . . . S G Q T P T Y P T T D P R I L H T I R R S A D G S T R F D F Y L N  
BLGLB1 N T T A P S D . . . . . E R A P D Q R P G G G E I N A A T T T A A T T H D P R I L H T I R Q S S D G T I R F D F Y L N  
ACJ53083.1 L E E L G I E T S . . . . . A E D D R G E V L R V E R A D E T G E N H F V F L F N  
AAL02053.1 L E E L G I E T S . . . . . A E D D R G E V V R V E R A D E T G E N H F V F L F N  
AAU00556.1 L E E L G I E T S . . . . . A E D D R G E V L R V E R A D E T G E N H F V F L F N  
ABE95226.1 L E E L G I E T S . . . . . A E D D R G E V L R V E R A D E T G E N H F V F L F N  
ACD98372.1 L E E L G I E T S . . . . . A E D D R G E V L R V E R A D E T G E N H F V F L F N  
BAQ98551.1 L G S M G L S D L . . . . . A G D . . G R V L R V E R A D A A A A S R F E F V F N  
ABP87597.1 L G S M G L S D L . . . . . A G D . . G R V L R V E R A D A A A A S R F E F V F N  
ADO53518.1 L G S M G L S D L . . . . . A G D . . G R V L R V E R A D A A A A S R F E F V F N  
CAC14567.1 F S S L G V E V P . . . . . E A S D . P G L L R V E R V D E A S G A R F V F L F N  
AGH68883.1 C A A L G F E L D . . . . . A D P R A G D V L R V V R E Q E D . G A I F E F L F N  
ACS45863.1 C A A L G F E L D . . . . . A D P R A G D V L R V V R E Q E D . G A I F E F L F N  
ACJ53470.1 V R R A G V T G I V S . . . . . P E P V E V V R R Y P S R G E S L T F V I N  
ACS45449.1 L S N A G V H T P G . . . . . M E L A G T V C V R S G T N T A G D T V T Y L L N Y S G S P I T F R A P

|            | 660 | 670 | 680 | 690 | 700 |   |   |   |   |   |   |   |   |   |   |   |   |   |   |   |   |   |   |   |   |   |   |   |   |   |   |   |   |   |   |   |   |   |   |   |   |   |   |   |   |   |   |   |
|------------|-----|-----|-----|-----|-----|---|---|---|---|---|---|---|---|---|---|---|---|---|---|---|---|---|---|---|---|---|---|---|---|---|---|---|---|---|---|---|---|---|---|---|---|---|---|---|---|---|---|---|
| AAR24113.1 | R   | G   | K   | T   | V   | E | L | Q | G | I | E | G | E | P | V | I | L | F | Q | T | D | R | E | E | K | P | G | S | Y | T | V | R | R | N | G | V | L | V | V | R | R | . | . | . | . | . | . |   |
| ACJ53184.1 | R   | G   | K   | S   | D   | V | E | L | R | D | I | A | G | E | P | I | V | L | F | R | A | E | R | G | S | D | G | G | A | Y | T | V | H | R | N | G | V | L | V | M | K | R | P | N | P | S | V | . |
| BPGLB1     | R   | G   | K   | K   | E   | I | A | L | Q | G | I | E | G | E | P | I | Y | L | F | Q | A | E | A | E | E | Q | T | G | S | Y | T | V | H | R | N | G | V | L | V | V | K | R | A | . | . | . | . | . |
| ABE95118.1 | R   | S   | N   | Q   | P   | V | A | I | N | G | V | E | G | K | P | I | I | A | H | R | C | E | T | D | A | V | G | . | Y | T | L | N | R | N | A | I | L | I | A | K | T | S | C | . | . | . | . | . |
| BAR71185.1 | R   | S   | N   | Q   | P   | V | A | I | N | G | V | E | G | K | P | I | I | A | H | R | C | E | T | D | A | V | G | . | Y | T | L | N | R | N | A | I | L | I | A | K | T | S | C | . | . | . | . | . |
| ALO71994.1 | R   | S   | N   | Q   | P   | V | A | I | N | G | V | E | G | D | P | I | I | A | H | R | C | E | T | D | A | V | G | . | Y | T | L | N | R | N | A | I | L | I | A | K | T | S | C | . | . | . | . | . |
| BLGLB1     | R   | S   | K   | Q   | P   | V | A | V | N | G | V | E | G | D | P | I | I | A | H | R | C | E | T | D | A | V | G | . | Y | T | L | N | R | N | A | I | L | I | A | K | T | S | C | . | . | . | . | . |
| ACJ53083.1 | R   | .   | T   | H   | D   | V | A | V | V | D | V | E | G | E | P | L | V | A | S | L | A | Q | V | N | E | S | E | H | T | A | A | I | Q | P | N | G | V | L | V | V | K | L | . | . | . | . | . |   |
| AAI02053.1 | R   | .   | T   | H   | D   | V | A | V | V | D | V | E | G | E | P | L | V | A | S | L | A | Q | V | N | E | S | E | H | T | A | A | I | Q | P | N | G | V | L | V | V | K | L | . | . | . | . | . |   |
| AAU00556.1 | R   | .   | T   | H   | D   | V | A | I | V | D | V | D | G | E | P | L | V | A | S | L | A | Q | V | N | E | S | E | H | T | A | A | I | Q | P | N | G | V | L | V | V | K | L | . | . | . | . | . |   |
| ABE95226.1 | R   | .   | T   | H   | D   | V | A | I | V | D | V | D | G | E | P | L | V | A | S | L | A | Q | V | N | E | S | E | H | T | A | A | I | Q | P | N | G | V | L | V | V | K | L | . | . | . | . | . |   |
| ACD98372.1 | R   | .   | T   | H   | D   | V | A | V | V | D | V | E | G | E | P | L | V | A | S | L | A | Q | V | N | E | S | E | H | T | A | A | I | Q | P | N | G | V | L | V | V | K | L | . | . | . | . | . |   |
| BAQ98551.1 | R   | .   | T   | H   | E   | P | V | T | V | D | V | E | G | E | A | I | A | A | S | L | A | H | V | D | D | G | . | . | R | A | T | I | D | P | T | G | V | V | V | L | R | . | . | . | . | . |   |   |
| ABP87597.1 | R   | .   | T   | H   | E   | P | V | T | V | D | V | E | G | E | A | I | A | A | S | L | A | H | V | D | D | G | . | . | R | A | T | I | D | P | T | G | V | V | V | L | R | . | . | . | . | . |   |   |
| ADO53518.1 | R   | .   | T   | H   | E   | P | V | T | V | D | V | E | G | E | A | I | A | A | S | L | A | H | V | D | D | G | . | . | R | A | T | I | D | P | T | G | V | V | V | L | R | . | . | . | . | . |   |   |
| CAC14567.1 | R   | .   | T   | H   | A   | V | I | E | A | M | Q | D | G | R | P | V | I | A | S | L | A | D | V | G | D | G | . | . | K | V | T | V | R | P | N | G | V | I | V | L | R | K | . | . | . | . | . |   |
| AGH68883.1 | R   | .   | T   | R   | N   | T | V | T | A | D | R | P | A | G | . | D | M | L | I | C | S | L | A | T | D | S | T | D | K | V | T | L | E | P | N | G | V | L | A | F | R | . | . | . | . | . |   |   |
| ACS45863.1 | R   | .   | T   | R   | N   | T | V | T | A | D | R | P | A | G | . | D | M | L | I | C | S | L | A | T | D | S | T | D | K | V | T | L | E | P | N | G | V | L | A | F | R | . | . | . | . | . |   |   |
| ACJ53470.1 | H   | A   | D   | T   | A   | T | A | W | Q | D | T | P | F | A | G | C | E | S | V | L | D | G | . | T | V | L | G | R | D | L | V | L | E | P | Y | G | V | T | V | V | R | T | A | A | . | . | . |   |
| ACS45449.1 | A   | S   | G   | T   | F   | L | L | G | H | P | T | D | D | G | E | Q | A | V | T | A | E | T | P | V | T | V | G | D | A | V | T | L | P | R | N | G | V | D | I | I | V | G | R | Q | P | T | M | N |

Figure S3. a series of conserved amino acid residues of the BLGLB1 and BPGLB1.



1 10 20 30 40 50 60  
BLGLB1 MTTRRTFRWPSLLTESGRGI AF GGD YNPDQWSE ETLD EDIRLMVQAGVN TVALAI FSWDK  
BPGLB1 ..MHRTFKWPPELLTDNGKGI AYGGDYNPDQWSE VWD EDVRLMKQAGVN TVAVAI FSWDR  
ABI35985.1 .....MLGVCY YPEHWPKE RWK EDAR RMRE AGLS HVRI GEFA WAL

70 80 90 100 110 120  
BLGLB1 IEPREGEFTFE WLDHVIDKLGAA GTAVDLASA TATAPLWLY ERHPEVLPIDRY GHVVNAG  
BPGLB1 IQPEENRWDFGWLDRIIDKLGKAGIAYDLASA TATAPLWLY EKHP EVLPIDRY GHVVNAG  
ABI35985.1 IEPPEGRLENGWLD EAIATLAAE GLKVVLGTP TATP PKWLVD RYPEILPVDR EGRRRRF G

130 140 150 160 170  
BLGLB1 SRQSWQP TSPV LKEYALR LCRK LAEHY KDNPY VTAW HMG NEYG WNN.RYD YSDNALA AFR  
BPGLB1 SRQSWSP TSPV FKEYALT LCRK LAERY GTNPY VTAW HMG NEYG WNN.RYD YSDNALN AFR  
ABI35985.1 GRRH YCF SSPV YREEARR IVTLLAERY GGLEA VAGF QTD NEYG CHD TVRC YCPRCQE AFR

180 190 200 210 220 230  
BLGLB1 TWCEAKYGTVDALNEAWGTAFWSQH VNSFDEVL LPRHMGGS MVNPNPQQ LDYERFGNDMT  
BPGLB1 LDWERYKAERDAIAEIC PDKPF TTNFMVSTDQCCMDYADWAEEVDFVSNDHY.....  
ABI35985.1 GWLEARYGTLEALNEAWGTAFWSQRYRSFAEVELEH LTVAE..PNP SHLLDY YRFASDQV

240 250 260 270 280  
BLGLB1 LD EYKAERDAI EEIC PGKPF TT NFMVSTDQCTMDY AQWANEVDFVSNDHY.....  
BPGLB1 LD EYKAERDAI AEIC PDKPF TT NFMVSTDQCCMDYADWAEEVDFVSNDHY.....  
ABI35985.1 RAENRLQV EILRAHAPGK FVTHNFMG..FFTD LDAFAL AQDLDFASWDSYPLGFTDLMPL

290 300 310 320 330 340  
BLGLB1 .....FH EGES HDELACSDALMDS LALGKP WYVMEHSTSA VQWKPLNMRKRA GELMRD  
BPGLB1 .....FH EGES HDELFCSDALMDS LALGKP WYVMEHSTSA VQWKPLNARKRK GETVRD  
ABI35985.1 PPEEKLRYARTGHPDVA AFHHDLYR VGRGR.FWVMEQPGPVN WAPHN P SPAPGMVRLW

350 360 370 380 390 400  
BLGLB1 SLAHVAMGADAINFFQWRQSASGA EAFHSAMVPHAGSDTKLFRGVCELGAA LKTLSDAGV  
BPGLB1 SLIAHVAMGADAINFFQWRASAFGAESBHSALVPHAGSDTKLFRQVCELGAA LKTLSDAGV  
ABI35985.1 TWEA LAHGA EVVS YFRWRQAPFAQE QMHAGLH RPD SAPDQGFEFAKRVAEE LAALALP..

410 420 430 440 450 460  
BLGLB1 QDTE LKRADT AILFSAESBWA TRSETLP SMKLNHWHDVRD WYRGYLDAGARADVVP LAYD  
BPGLB1 QGTE LEQSDT AILFSAESBWA TRSETLP SMKLNHWHDVRD WYRAFLNAGTRADIVPLKYD  
ABI35985.1 ...PV AQAPVALVFDY EAAWILEYVQPQ.GAEW SYLGLVYL EYSALRR LGLD VDVVP GAS

470 480 490 500 510 520  
BLGLB1 WSGYQTIVLPFVI ALSDDEDTRRIADFAENG GTIVVGYATGLIDEH FHHIGLGGYPGAGNGL  
BPGLB1 WSA YKTIVLPFVI IMLSAEDTQRLADFAAAGGRVVI GYATGLIDEH FHTWLGGYPGAGDGL  
ABI35985.1 LRCYAF AVVPSLP IVR...EEAL EAREAE GPVLEF GPRSGSKT ET FQIPKELP PGPLQAL

530 540 550 560 570 580  
BLGLB1 L RDM LGIRSEEFNI LGEEAEDEPAEIG LSNGLTTRLW QNDVTSVAPDTRVLATYVGTA AA  
BPGLB1 L R EMLGIRSEEFNI LGAEAE GEPSEIRLSSGAVTRLW QNDVNVDGERAQVLATYEGEEAD  
ABI35985.1 LPLKVVRVESLP PG LLEVAE GALGRFP LG.....LWR.....

590 600 610 620 630 640  
BLGLB1 DWELDGVPAIT TSHPHGQGAAIYV GCDLGRHDITHLLKELNTTAPSDERAPDQRP GGGEIN  
BPGLB1 EWE LGAAAITRNPHY GSGETYFV GCDLNVADLTEFVREN.....I  
ABI35985.1 EWVEA PLKPLTFQD GK G ALYREGRYTYLAAWPSPELAG.....

|            | 650                        | 660       | 670           | 680    | 690 | 700    |                 |
|------------|----------------------------|-----------|---------------|--------|-----|--------|-----------------|
| BLGLB1     | AATTAATTHDPRILHTIRQSSDGTIR | FD        | FYL           | NRSKQP | VAV | NGV    | EGDPIIAHRCETDAV |
| BPGLB1     | VEDSANVANPTDSDVLHTVRKSAD   | ..        | AT            | FD     | FYL | SRGKKE | IALQGI          |
| ABI35985.1 | RLLSALA                    | AAEAGLKVL | SLPEGLRLRRRGT | WVF    | AFN | YGPEA  | VEAPAS          |
|            |                            |           |               |        |     |        | EGARFL          |
|            |                            |           |               |        |     |        | LGSRRVGPY       |

  

|            | 710                 |
|------------|---------------------|
| BLGLB1     | G..YTLNRRNAILIAKTSC |
| BPGLB1     | TGSYTVHRNGVLVVKRA.  |
| ABI35985.1 | DLAVWEEA.....       |

**Figure S4.** The key amino acid residue positions of sequence alignment of BLGLB1 and BPGLB1 with the  $\beta$ -galactosidase from *Thermus thermophiles*.
